# Supplementary material for: Pathophysiologic Contributions of Visceral Adiposity to Left Ventricular Diastolic Dysfunction
Source: MDPI journal article supplement (doi:10.3390/jcdd10060247), 2023-06-05
Supplement: s1 [file s1]

**Table S1: Primer sequences**

|               | Forward (5'-3')           | Reverse (5'-3')          |
|---------------|---------------------------|--------------------------|
| $\beta$ actin | CTGGCACCCAGCACAATG        | CCGATCCACACGGAGTATTG     |
| IL-6          | AAGCCAGAGCTGTGCAGATGAGTA  | TGTCCTGCAGCCACTGGTTC     |
| TNF $\alpha$  | CTGCCTGCTGCACTTTGGAG      | ACATGGGCTACAGGCTTGTCCT   |
| CRP           | AATGTGAACATGTGGGACTTTGTG  | CGCCAGTTCAGGACATTAGGAC   |
| IL-1 $\beta$  | CCAGGGACAGGATATGGAGCA     | TTCAACACGCAGGACAGGTACAG  |
| TGF $\beta$   | TCCTGGCGATACCTCAGCAA      | GCTAAGGCGAAAGCCCTCAA     |
| IFN $\gamma$  | CTTTAAAGATGACCAGAGCATCCAA | GGCGACAGTTCAGCCATCAC     |
| IL-2          | CTTCTGTGCCTGCTGCTCATA     | CTTTGGGACACTTGCTGCTG     |
| IL-8          | CACTGTGTGTAAACATGACTTCCAA | TGTGGTCCACTCTCAATCACTCTC |
| ADIPOQ        | CTGGCTATGCTCACAGTCTCACATC | CTCTGTGCCTCTGGTTCCACAA   |
| LEP           | CCTGACTGGTGCTATAGGCTGGA   | GGCTGTTTCTGCTGCTGTGGTAA  |

ADIPOQ, adiponectin; CRP, C-reactive protein; IFN, interferon; IL, interleukin; LEP, leptin; TGF, transforming growth factor; and TNF, tumor necrosis factor.
